# Supplementary material
Source: PubMed Central journal article supplement (PMC3154624)

Figure 6

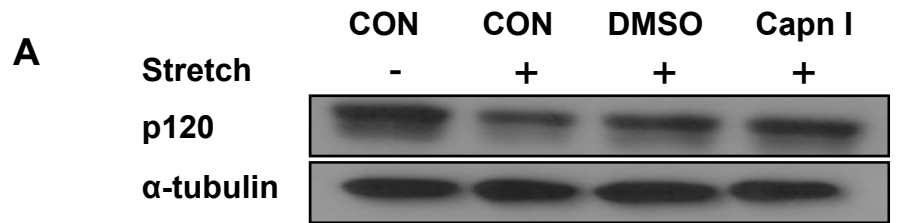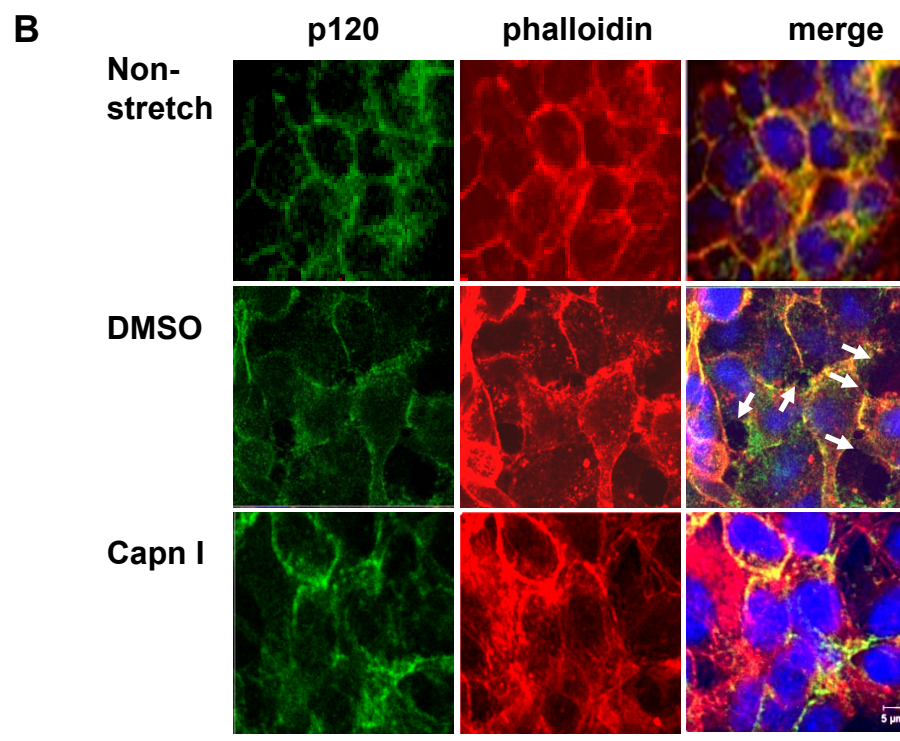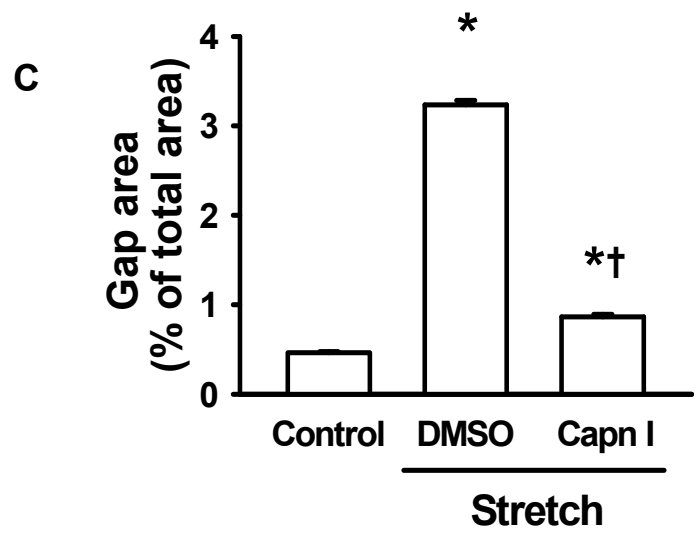

Supplement: supp_00048.2011_Figures-6-AJP-modified.pdf [file supp_00048.2011_Figures-6-AJP-modified.pdf]
